# Supplementary material for: Telmisartan Tablets Repackaged into Dose Administration Aids: Physicochemical Stability under Tropical Conditions
Source: MDPI journal article supplement (doi:10.3390/pharmaceutics14081667), 2022-08-11
Supplement: s1 [file s1]

# Supplementary Material - Figures

| Filler | Mannitol                                                                          |                                                                                   |                                                                                   |                                                                                     |                                                                                     | Sorbitol                                                                            | Lactose                                                                             |                                                                                     |
|--------|-----------------------------------------------------------------------------------|-----------------------------------------------------------------------------------|-----------------------------------------------------------------------------------|-------------------------------------------------------------------------------------|-------------------------------------------------------------------------------------|-------------------------------------------------------------------------------------|-------------------------------------------------------------------------------------|-------------------------------------------------------------------------------------|
| Brand  | Mizart®                                                                           | GH®                                                                               | Teltartan®                                                                        | DRLA®                                                                               | APO®                                                                                | Micardis®                                                                           | Sandoz®                                                                             | Pharmacor®                                                                          |
| Day 0  | 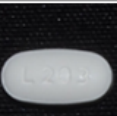 |  |  |  |  |  |  |  |
| Day 28 |  |  |  |  |  |  |  |  |

**Figure S1.** Visual comparison of telmisartan brands after repackaging and storage for 28 days at 30°C/75% RH.

## Supplementary Material - Tables

**Table S1.** HPLC validation data

| Telmisartan concentration (µg/mL) | % Relative Standard Deviation (%RSD) | % Relative Error (%RE) |
|-----------------------------------|--------------------------------------|------------------------|
| 12.02                             | 0.30%                                | 0.86%                  |
| 36.06                             | 0.18%                                | 0.18%                  |
| 60.10                             | 0.48%                                | 0.12%                  |

|                                                         |          |
|---------------------------------------------------------|----------|
| Typical retention time                                  | 4.7 mins |
| Linearity ( $r^2$ )                                     | > 0.99   |
| Peak tailing factor (USP specification of NMT 2.0) [31] | 1.4      |

|                                                         |                                                |                                                                                                                                                                             |
|---------------------------------------------------------|------------------------------------------------|-----------------------------------------------------------------------------------------------------------------------------------------------------------------------------|
| Acidic conditions for forced degradation of telmisartan | 0.5M hydrochloric acid, 50% acetonitrile, 60°C | Comment:<br>Specificity was demonstrated in the presence of tablet excipients and forced degradation products of telmisartan generated under acidic and alkaline conditions |
| Basic conditions for forced degradation of telmisartan  | 1M sodium hydroxide, 50% acetonitrile, 60°C    |                                                                                                                                                                             |

**Table S2.** Results from visual inspection and physical tests used to screen telmisartan tablet brands.

| Tablet Brand                                                                                                                              |                                    | Mizart®     | GH®         | Teltartan®   | DRLA®       | APO®        | Micardis®                | Sandoz®                  | Pharmacor®   |
|-------------------------------------------------------------------------------------------------------------------------------------------|------------------------------------|-------------|-------------|--------------|-------------|-------------|--------------------------|--------------------------|--------------|
| Tablet filler                                                                                                                             |                                    | Mannitol    | Mannitol    | Mannitol     | Mannitol    | Mannitol    | Sorbitol                 | Lactose                  | Lactose      |
| <b>Visual Inspection</b>                                                                                                                  |                                    |             |             |              |             |             |                          |                          |              |
| 56 repackaged tablets were inspected for damage, swelling, mottling, discolouration, other visible changes, and fusion to the container.  | Tablet intact                      | Yes         | Yes         | Yes          | Yes         | Yes         | Yes                      | Yes                      | Yes          |
|                                                                                                                                           | Tablet discolouration              | Yes, Day 28 | Yes, Day 28 | Yes, Day 28  | No          | Yes, Day 21 | Yes, Day 7               | Yes, Day 7               | Yes, Day 7   |
|                                                                                                                                           | Tablet surface changes             | Yes         | Yes         | Yes          | Yes         | Yes         | Yes                      | Yes                      | Yes          |
|                                                                                                                                           | Tablets adhered to container       | No          | Yes         | Yes          | Yes         | Yes         | Yes                      | Yes                      | Yes          |
|                                                                                                                                           | % of tablets adhered, day          |             | <10%, day 7 | <10%, day 14 | >10%, day 7 | >10%, day 7 | 100%, day 7              | 100%, day 7              | >10%, day 14 |
| <b>Physical Tests</b>                                                                                                                     |                                    |             |             |              |             |             |                          |                          |              |
| <b>Uniformity of Weight</b>                                                                                                               |                                    |             |             |              |             |             |                          |                          |              |
| Average weight ± SEM for 20 tablets                                                                                                       | Day 0 (mg)                         | 240.3 ± 0.2 | 241.6 ± 0.4 | 241.4 ± 0.3  | 290.5 ± 0.3 | 240.4 ± 0.4 | 240 ± 0.4                | 238.8 ± 0.3              | 239.2 ± 0.9  |
|                                                                                                                                           | Test result                        | Pass        | Pass        | Pass         | Pass        | Pass        | Pass                     | Pass                     | Pass         |
|                                                                                                                                           | Day 28 (mg)                        | 253.1 ± 0.3 | 253.7 ± 0.3 | 254.6 ± 0.3  | 302.6 ± 0.4 | 254 ± 0.4   | 267.6 ± 1.7              | 258.8 ± 0.4              | 253 ± 0.8    |
|                                                                                                                                           | Test result                        | Pass        | Pass        | Pass         | Pass        | Pass        | Pass                     | Pass                     | Pass         |
| Test pass if no more than 2 tablets deviate by 7.5% from the average mass and no more than 1 tablet deviates by 15% from the average mass | % Average change                   | 5.3%        | 5.0%        | 5.5%         | 4.2%        | 5.7%        | 11.5%                    | 8.4%                     | 5.8%         |
|                                                                                                                                           |                                    |             |             |              |             |             |                          |                          |              |
| <b>Thickness</b>                                                                                                                          |                                    |             |             |              |             |             |                          |                          |              |
| Values are average thickness ± SEM for 10 tablets                                                                                         | Day 0 (mm)                         | 4.34 ± 0.01 | 4.31 ± 0.01 | 4.25 ± 0.01  | 4.77 ± 0.01 | 4.31 ± 0.01 | 3.78 ± 0.01              | 3.43 ± 0                 | 3.86 ± 0.01  |
|                                                                                                                                           | Day 28 (mm)                        | 4.25 ± 0.01 | 4.28 ± 0    | 4.18 ± 0.01  | 4.74 ± 0    | 4.23 ± 0.01 | 3.81 ± 0.02              | 3.53 ± 0.01              | 4.26 ± 0.02  |
|                                                                                                                                           | % Average change                   | -2.0%       | -0.7%       | -1.6%        | -0.5%       | -2.0%       | 0.7%                     | 3.0%                     | 10.3%        |
| <b>Hardness</b>                                                                                                                           |                                    |             |             |              |             |             |                          |                          |              |
| Hardness for 10 tablets                                                                                                                   | Day 0 average (N)                  | 75          | 79          | 87           | 164         | 71          | 133                      | 126                      | 129          |
|                                                                                                                                           | Day 0 minimum (N)                  | 61          | 70          | 79           | 149         | 56          | 124                      | 116                      | 115          |
|                                                                                                                                           | Day 0 maximum (N)                  | 86          | 90          | 94           | 176         | 89          | 148                      | 140                      | 149          |
|                                                                                                                                           | Day 28 average (N)                 | 116         | 115         | 127          | 137         | 117         | Loss of tablet integrity | Loss of tablet integrity | 89           |
|                                                                                                                                           | Day 28 minimum (N)                 | 107         | 110         | 123          | 129         | 112         |                          |                          | 83           |
|                                                                                                                                           | Day 28 maximum (N)                 | 123         | 120         | 130          | 180         | 125         |                          |                          | 93           |
|                                                                                                                                           | % Average change                   | 56.1%       | 44.7%       | 46.4%        | -16.2%      | 64.4%       |                          |                          | -31.4%       |
|                                                                                                                                           |                                    |             |             |              |             |             |                          |                          |              |
| <b>Friability</b>                                                                                                                         |                                    |             |             |              |             |             |                          |                          |              |
| Each sample is whole tablets with a mass as close to 6.5g as possible<br>Test pass if loss of mass is not greater than 1.0%               | Day 0 starting mass (28 tablets)   | 6.7064      | 6.7709      | 6.7733       |             |             |                          |                          |              |
|                                                                                                                                           | Day 0 finishing mass (28 tablets)  | 6.7085      | 6.7703      | 6.7565       |             |             |                          |                          |              |
|                                                                                                                                           | Day 0 % mass change                | 0.0%        | 0.0%        | -0.2%        |             |             |                          |                          |              |
|                                                                                                                                           | Test result                        | Pass        | Pass        | Pass         |             |             |                          |                          |              |
|                                                                                                                                           | Day 28 starting mass (26 tablets)  | 6.5776      | 6.5826      | 6.5766       |             |             |                          |                          |              |
|                                                                                                                                           | Day 28 finishing mass (26 tablets) | 6.5531      | 6.5760      | 6.5501       |             |             |                          |                          |              |
|                                                                                                                                           | Day 28 % mass change               | -0.4%       | -0.1%       | -0.4%        |             |             |                          |                          |              |
|                                                                                                                                           |                                    |             |             |              |             |             |                          |                          |              |

|                                                       | Test result    | Pass  | Pass | Pass  |
|-------------------------------------------------------|----------------|-------|------|-------|
| <b>Disintegration</b>                                 | Day 0 (min:s)  | 7:08  | 8:20 | 7:31  |
| Time of 6 tablets to disintegrate                     | Test result    | Pass  | Pass | Pass  |
| Test pass if 6 tablets disintegrate within 15 minutes | Day 28 (min:s) | 8:05  | 8:56 | 9:01  |
|                                                       | Test result    | Pass  | Pass | Pass  |
|                                                       | % Change       | 13.3% | 7.2% | 20.0% |

**Table S3.** Physical dimensions of Micardis® and Mizart® tablets when removed from manufacturer's packaging.

|                 | Micardis®      | Mizart®        |
|-----------------|----------------|----------------|
| Shape           | Oblong, convex | Oblong, convex |
| Length (mm)*    | 12.03 ± 0.01   | 12.08 ± 0.01   |
| Width (mm)*     | 5.93 ± 0.02    | 5.93 ± 0.00    |
| Thickness (mm)† | 3.78 ± 0.01    | 4.34 ± 0.01    |
| Weight (mg)†    | 240 ± 0.4      | 240.3 ± 0.2    |

\* Mean ± SEM for (n=3) measurements.

† Mean ± SEM (n=20) measurements. Data replicated from Table S2.
